# Supplementary material for: Expression of a single inhibitory member of the Ly49 receptor family is sufficient to license NK cells for effector functions
Source: eLife. 2025 Mar 14;13:RP100218. doi: 10.7554/eLife.100218 (PMC11908779; doi:10.7554/eLife.100218)
Supplement: Figure 1—source data 2. [file elife-100218-fig1-data2.xlsx]

## Sheet: Figure 1B
	Ly49 % receptor+
	Wildtype				Ly49 HET			Ly49KO
Ly49A	17.7	18.9	18		10.4	10.9		0	0
Ly49C	36.8	37.4	39.9		23.9	23.6		0.53	1.21
Ly49D	54.5	55.8	53.7		36.5	36.6		0.00767	0
Ly49EF	7.95	7.44	6.91		6.59	6.67		0.046	0.045
Ly49F	6.74	6.06	5.72		5.85	5.83		0	0.019
Ly49G2	47.3	44.8	44.8		29.5	30.5		0.055	0.069
Ly49H	63	61.5	63.8		40.2	42.6		1.18	1.22
Ly49I	50	53.6	51.8		35	33.7		0.1	0.077
	Ly49 relative MFI
	Wildtype				Ly49 HET
Ly49A	101.791	95.0011	103.208		101.551	102.499
Ly49C	106.875	95.475	97.65		88.8375	87.8625
Ly49D	102.41	98.4522	99.1383		87.3194	84.3632
Ly49EF	101.434	97.3861	101.18		92.8522	107.171
Ly49F	101.857	92.834	105.309		94.6072	109.672
Ly49G2	104.06	95.7891	100.151		107.676	103.172
Ly49H	100.826	97.654	101.52		90.176	94.158
Ly49I	99.018	93.8324	107.15		77.3668	70.2697

## Sheet: Figure 1C
	% surface receptor+
	Wildtype				Ly49KO
2B4	91.3	90.6	96.7		95.4	94.5	94.1
CD122	99.9	100	99.9		100	100	99.9
NKG2A	44.2	45.8	43.6		35.2	39.2	36.8
CD94	44	45.5	44		34.9	37.9	35.8
NKG2D	96.1	94.9	94.7		86.3	90.1	93
KLRG1	43.9	43.6	45.9		20	23.5
	surface receptor relative MFI
	Wildtype				Ly49KO
2B4	90.5932	88.0767	121.33		105.962	100.389	101.198
CD122	99.1886	97.5982	103.213		96.6894	97.8254	98.507
NKG2A	108.206	98.5358	93.2583		106.911	119.138	107.681
CD94	103.448	101.783	94.7687		90.2775	86.0387	77.8133
NKG2D	103.839	99.88	96.2807		74.5051	80.9838	83.6833
KLRG1	94.9401	101.592	103.468		74.6484	82.9303

## Sheet: Figure 1D
	CD27 SP				CD27+CD11b+				CD11b SP				DN
Wildtype	11.3	13.6	9.08		40.3	38.6	33.3		47.4	46.7	56.7		1.04	1.15	0.91
Ly49KO	7.82	11.4	6.16		45.3	45.5	39.6		46.3	42.1	53.7		0.6	0.94	0.5
