# Supplementary material for: Expression of a single inhibitory member of the Ly49 receptor family is sufficient to license NK cells for effector functions
Source: eLife. 2025 Mar 14;13:RP100218. doi: 10.7554/eLife.100218 (PMC11908779; doi:10.7554/eLife.100218)
Supplement: Figure 2—source data 1. [file elife-100218-fig2-data1.xlsx]

## Sheet: Figure 2A
	Wildtype				Ly49KO			KODO
% IFNgamma+	31.7	34.3	32.7		8.3	9.75		11.6	4.96	12.1

## Sheet: Figure 2B
	Wildtype				Ly49KO			KODO
% IFNgamma+	75.6	75.8	74		82.1	83.4		84.5	82.6	81.6

## Sheet: Figure 2C
	Anti-NK1.1								Wildtype									Ly49 KO
MHC-I KO	-1.95312	-2.08988	5.23358	-1.21771	-8.66292	4.96688	4.32611		86.9053	79.4171	91.8991	83.5791	94.5917	91.0593	95.3473	96.7444		-4.59546	1.54591	2.1136	0.950891	-8.40563	-0.880654	-0.821977
Kb KO	-1.31247	0.344689	1.86643	-1.00119	-1.35455	1.00604	0.222556		83.2446	75.3419	89.0688	79.1219	90.5847	82.8691	90.1123	90.4725		-8.93005	-2.80389	-2.87667	-0.685029	-10.2083	-2.59077	-0.82976
Db KO	-3.77344	2.44557	4.42406	-3.15328	-0.606911	1.92802	-1.37594		13.0023	8.94626	11.7078	6.20334	14.9159	16.519	7.49878	23.0857		-0.628624	12.6163	11.7336	10.4986	1.38399	-5.16217	1.56284
