# Supplementary material for: Expression of a single inhibitory member of the Ly49 receptor family is sufficient to license NK cells for effector functions
Source: eLife. 2025 Mar 14;13:RP100218. doi: 10.7554/eLife.100218 (PMC11908779; doi:10.7554/eLife.100218)
Supplement: Figure 3—source data 1. [file elife-100218-fig3-data1.xlsx]

## Sheet: Figure 3A
	D8-KODO					D8-KODO Ly49KO					D8-KODO Ly49KO Ly49AKI
% Ly49A+	15.5	18.1	17.4	17.7		0.02	0	0.019	0		95.3	94.5	93.6	90.6
	D8-KODO					D8-KODO Ly49KO					D8-KODO Ly49KO Ly49AKI
MFI Ly49A+	8339	8257	8633	8484		n/a	n/a	n/a	n/a		4590	5256	4348	4834

## Sheet: Figure 3B
Spleen
	CD27 SP					CD27+CD11b+					CD11b SP					DN
D8-KODO	14.3	12.2	13.2	10.8		37.7	34.8	34.1	26.1		45.9	50.8	50.6	61.4		2.12	2.22	2.14	1.7
D8-KODO Ly49KO	11.4	12.5	10	9.33		33.7	35.5	32.4	36.8		53	50.4	56	52.5		1.83	1.63	1.59	1.42
D8-KODO Ly49KO Ly49AKI	17.2	19.4	19.6	19.4		27.7	27.3	28.1	26.7		51.9	50.3	49	50.4		3.22	3.08	3.39	3.44
Bone Marrow
	CD27 SP					CD27+CD11b+					CD11b SP					DN
D8-KODO	34.5	34.2	34.4	37		45.5	45.7	45.1	36.9		16.3	17.2	17.9	21.8		3.68	2.93	2.52	4.34
D8-KODO Ly49KO	50.9	52	62.5	50.2		34.3	33.4	21.2	32.4		12	11.7	12.9	15.1		2.78	2.96	3.43	2.3
D8-KODO Ly49KO Ly49AKI	52.7	47.6	51.4	53.3		33.4	35	32.6	33		11.6	15	13.8	10.8		2.35	2.37	2.26	2.94
Liver
	CD27 SP					CD27+CD11b+					CD11b SP					DN
D8-KODO	21.9	28.6	25.6	24.5		31.5	30.3	30.3	24.9		35.7	31.9	35.7	42.3		10.9	9.18	8.37	8.35
D8-KODO Ly49KO	25.6	22.4	24.9	18.2		27.9	29.7	23.4	33		33.7	38.4	38.8	41.2		12.8	9.46	12.9	7.61
D8-KODO Ly49KO Ly49AKI	26.1	23.2	25.7	19.3		23.2	30.4	24.9	19.7		43.1	41.8	41.9	54.8		7.53	4.56	7.44	6.19

## Sheet: Figure 3C
Spleen
	D8-KODO					D8-KODO Ly49KO					D8-KODO Ly49KO Ly49AKI
%KLRG1+	37.4	37.6	35.8	55.4		15.8	18.9	32.8	23.2		42.6	42.6	37.8	54.9
Bone Marrow
	D8-KODO					D8-KODO Ly49KO					D8-KODO Ly49KO Ly49AKI
%KLRG1+	14	14.4	15.8	28.7		6.39	7.35	11.5	10.3		22.2	19.5	13.3	17.3
Liver
	D8-KODO					D8-KODO Ly49KO					D8-KODO Ly49KO Ly49AKI
%KLRG1+	37.5	34.4	36	49.2		19.5	24.3	34.4	29.9		48	46.5	41.9	63
