# Supplementary material for: Expression of a single inhibitory member of the Ly49 receptor family is sufficient to license NK cells for effector functions
Source: eLife. 2025 Mar 14;13:RP100218. doi: 10.7554/eLife.100218 (PMC11908779; doi:10.7554/eLife.100218)
Supplement: Figure 4—source data 1. [file elife-100218-fig4-data1.xlsx]

## Sheet: Figure 4A
anti-NK1.1
	D8-KODO					D8-KODO Ly49A+					D8-KODO Ly49KO					D8-KODO Ly49KO Ly49AKI
% IFN-gamma+	22	22.6	18.9	21.8		38	36.1	27.4	37		13.4	12	4.49	8.53		32.5	38.1	31.8	37.2
	D8-KODO					D8-KODO Ly49A+					D8-KODO Ly49KO					D8-KODO Ly49KO Ly49AKI
% CD107a+	27	28	23.8	25.8		40.5	40.1	31.8	40.5		20.3	23	6.94	13		39.2	44.4	39.9	47.2

## Sheet: Figure 4B
PMA/Ionomycin
	D8-KODO					D8-KODO Ly49A+					D8-KODO Ly49KO					D8-KODO Ly49KO Ly49AKI
% IFN-gamma+	83.6	84.8	83	86.2		87.8	88.2	83.4	92.3		81.3	74.8	87.7	91.3		80.7	83.7	85.4	80.3
	D8-KODO					D8-KODO Ly49A+					D8-KODO Ly49KO					D8-KODO Ly49KO Ly49AKI
% CD107a+	78	79.8	76.8	68.2		82.2	80.7	75.1	70.2		81.9	67.9	70.2	73.1		76.5	66.9	74	64.8

## Sheet: Figure 4C
	D8-KODO							D8-KODO Ly49KO									D8-KODO Ly49KO Ly49AKI
% KODO rejection	97.1192	96.8623	100	95.8136	98.8867	97.9379		-6.10809	-3.58156	7.77521	6.66183	-5.68248	12.2804	-13.2097	-0.739893		96.9894	94.0839	98.8985	98.8488	97.5679	98.6596	96.5437
